# Supplementary material for: Hematite iron oxide nanorod patterning inside COK-12 mesochannels as an efficient visible light photocatalyst
Source: Royal Society of Chemistry journal article supplement (doi:10.1039/c5ta05075h), 2015-01-01
Supplement: c5ta05075h2.pdf [file c5ta05075h2.pdf]

## **Hematite iron oxide nanorod patterning inside COK-12 mesochannels as an efficient visible light photocatalyst**

*Lik H. Wee,<sup>\*†</sup> Maria Meledina,<sup>‡</sup> Stuart Turner,<sup>‡</sup> Kristof Custers,<sup>†</sup> Stef Kerkhofs,<sup>†</sup> Gustaaf Van Tendeloo,<sup>‡</sup> Johan A. Martens<sup>†</sup>*

<sup>†</sup>Centre for Surface Chemistry and Catalysis, KU Leuven, Celestijnenlaan 200f, B3001, Heverlee, Belgium, and<sup>‡</sup>Electron Microscopy for Materials Science, University of Antwerp, Groenenborgerlaan 171, B2020, Antwerp, Belgium

\*[likhong.wee@biw.kuleuven.be](mailto:likhong.wee@biw.kuleuven.be)

Table S1. Physicochemical properties of COK-12 and  $\alpha$ -Fe<sub>2</sub>O<sub>3</sub>@COK-12.

| Samples                                          | $d_{10}^a$<br>(nm) | $a^b$<br>(nm) | BET surface<br>area (cm <sup>2</sup> /g) | Langmuir<br>surface area<br>(cm <sup>2</sup> /g) | Pore volume<br>(cm <sup>3</sup> /g) | Pore<br>diameter <sup>c</sup><br>(nm) |
|--------------------------------------------------|--------------------|---------------|------------------------------------------|--------------------------------------------------|-------------------------------------|---------------------------------------|
| COK-12                                           | 9.28               | 10.7          | 478                                      | 546                                              | 0.32                                | 4.9                                   |
| $\alpha$ -Fe <sub>2</sub> O <sub>3</sub> @COK-12 | 9.19               | 10.6          | 411                                      | 463                                              | 0.29                                | 4.9                                   |

<sup>a</sup> $d_{10}$  spacing of calcined material determined from SAXS; <sup>b</sup>unit cell parameter calculated from SAXS; <sup>c</sup>pore diameter determined from BJH method

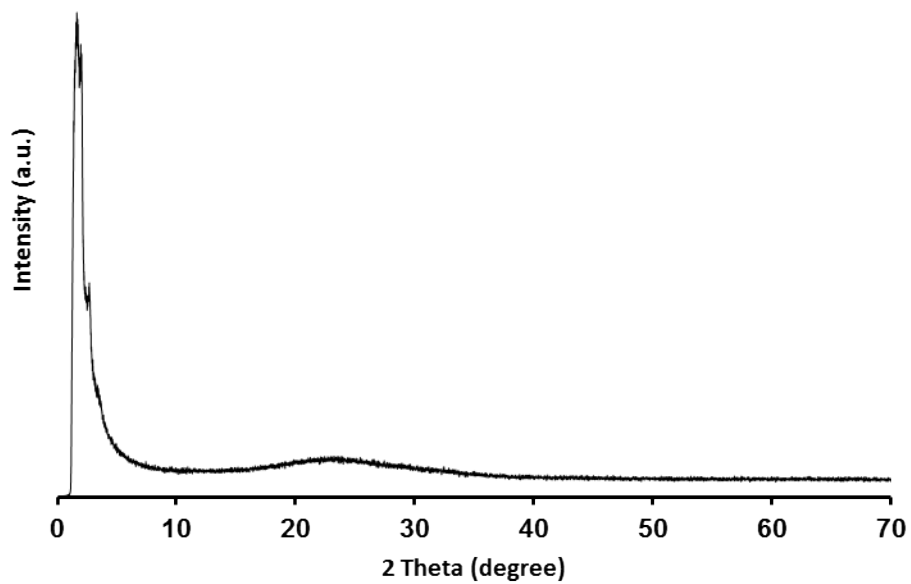

Figure S1. XRD pattern of  $\alpha\text{-Fe}_2\text{O}_3@\text{COK-12}$
